# Supplementary material for: Elucidating the performance benefits enabled by YSZ/Ni–YSZ bilayer thin films in a porous anode-supported cell architecture
Source: Royal Society of Chemistry journal article supplement (doi:10.1039/d3nr01604h), 2023-01-01
Supplement: d3nr01604h1.pdf [file d3nr01604h1.pdf]

## Supporting Information

### **Direct deposition of dense YSZ/Ni-YSZ thin-film bilayers on porous anode-supported cells with high performance and stability**

Katherine Develos-Bagarinao,<sup>\*a</sup> Toshiaki Yamaguchi<sup>b</sup> and Haruo Kishimoto<sup>a</sup>

---

<sup>a</sup> *Global Zero Emission Research Center, National Institute of Advanced Industrial Science and Technology, AIST West, 16-1 Onogawa, Tsukuba, Ibaraki 305-8569, Japan*

<sup>b</sup> *Energy Process Research Institute, National Institute of Advanced Industrial Science and Technology, AIST Tsukuba West, 16-1 Onogawa, Tsukuba, Ibaraki, 305-8569, Japan*

\* Corresponding author. Email: [develos-bagarinao@aist.go.jp](mailto:develos-bagarinao@aist.go.jp)

(a)

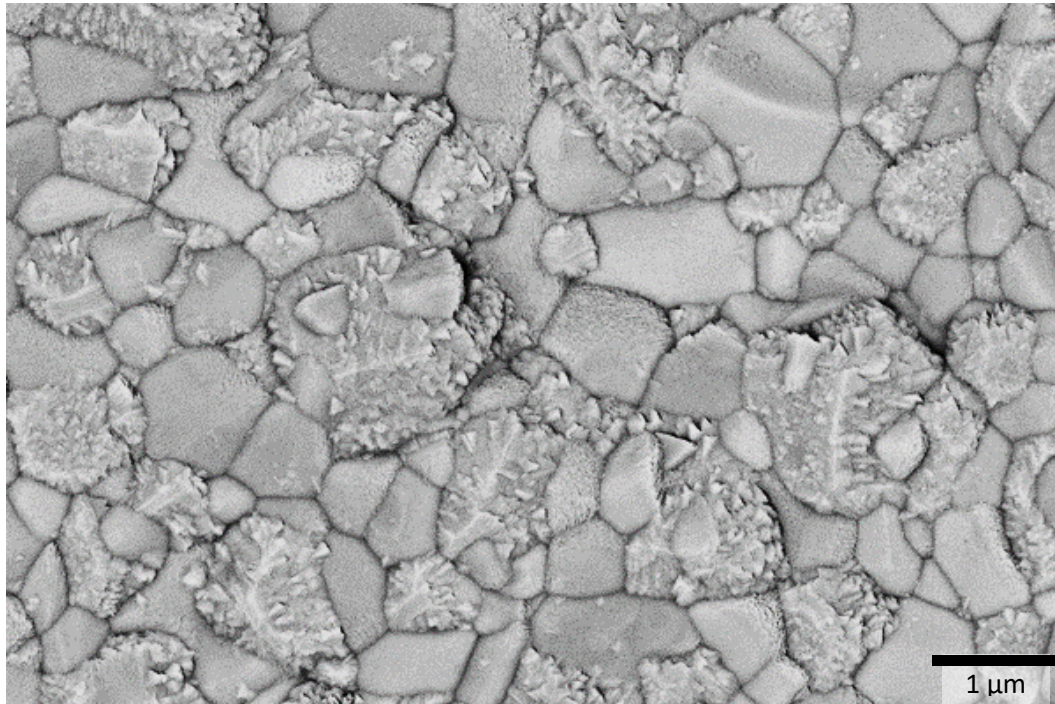

(b)

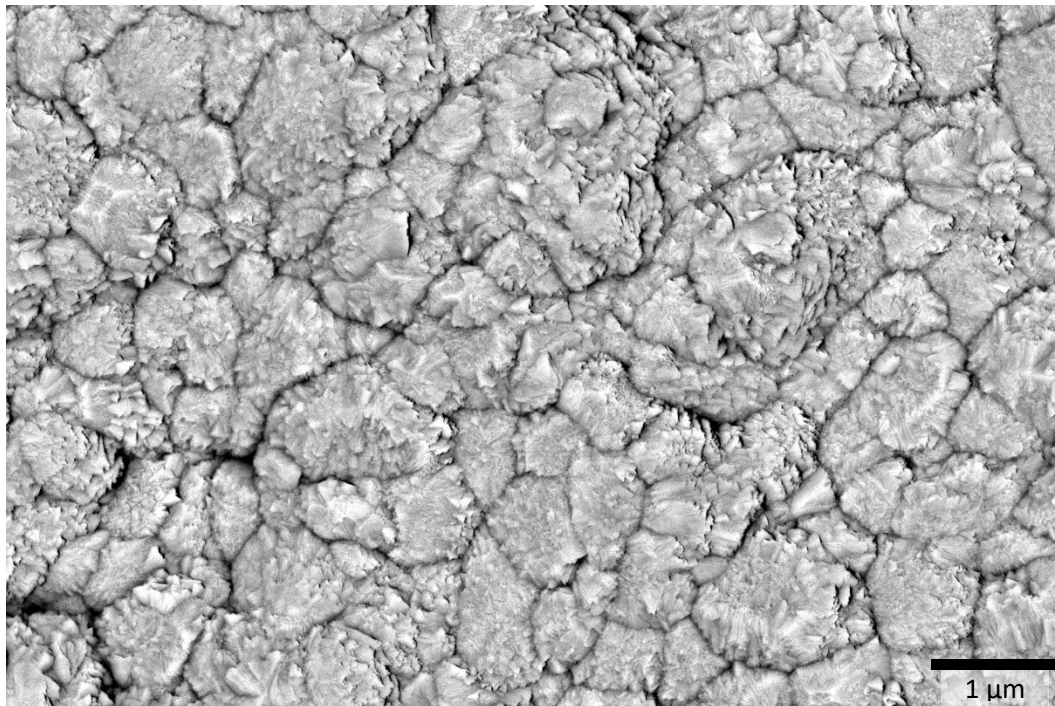

**Figure S1.** Typical plan-view SEM images depicting the YSZ thin film surface morphologies deposited on AFL/anode-supported cells a) without and b) with NiO-YSZ nanocomposite layer. Without the NiO-YSZ nanocomposite layer, YSZ grains exhibit a bimodal grain distribution, i.e., less homogeneous layer.



## PLD-YSZ, as-prepared

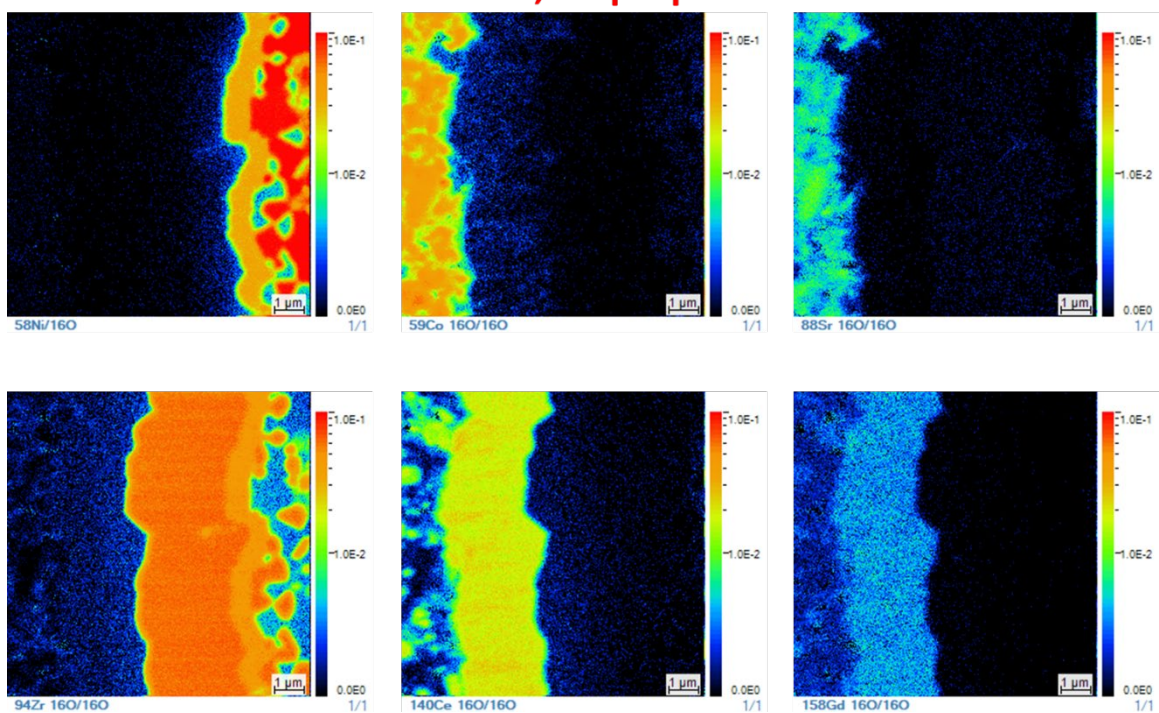

## PLD-YSZ, tested

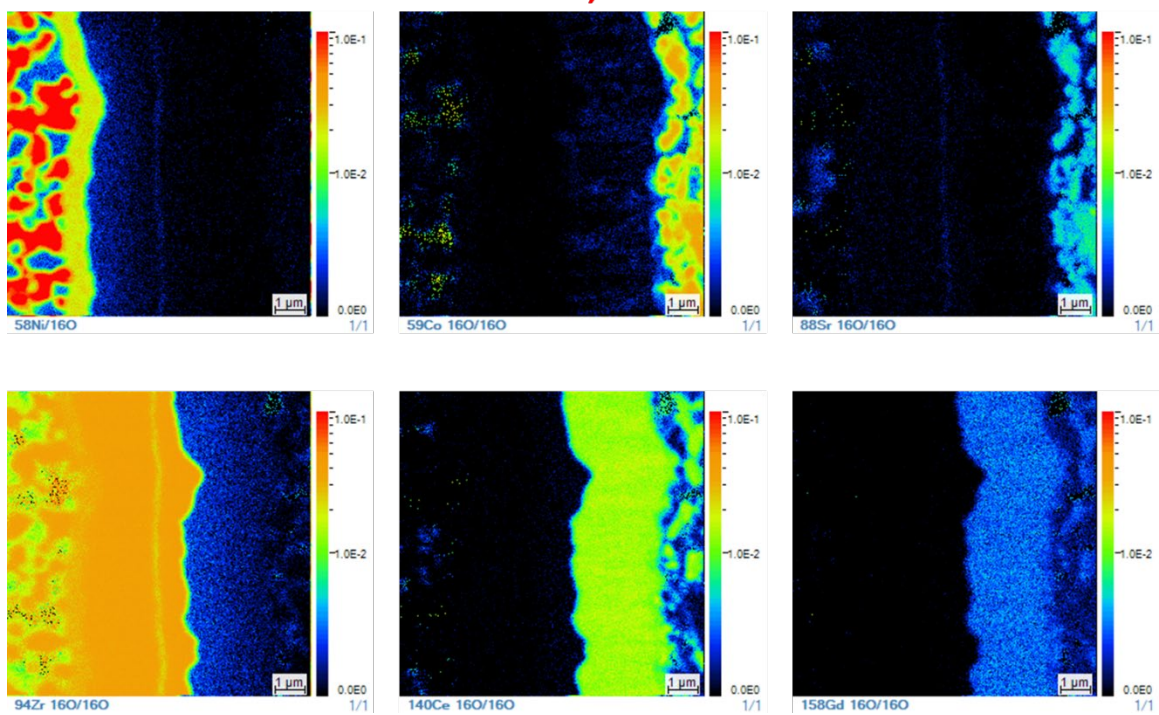

**Figure S2.** SIMS elemental mapping of  $^{58}\text{Ni}$ ,  $^{59}\text{Co}^{16}\text{O}$ ,  $^{88}\text{Sr}^{16}\text{O}$ ,  $^{94}\text{Zr}^{16}\text{O}$  and  $^{140}\text{Ce}^{16}\text{O}$  normalized by  $^{16}\text{O}$  for PLD-5 (PLD-YSZ layer).

### Screen-printed YSZ, as-prepared

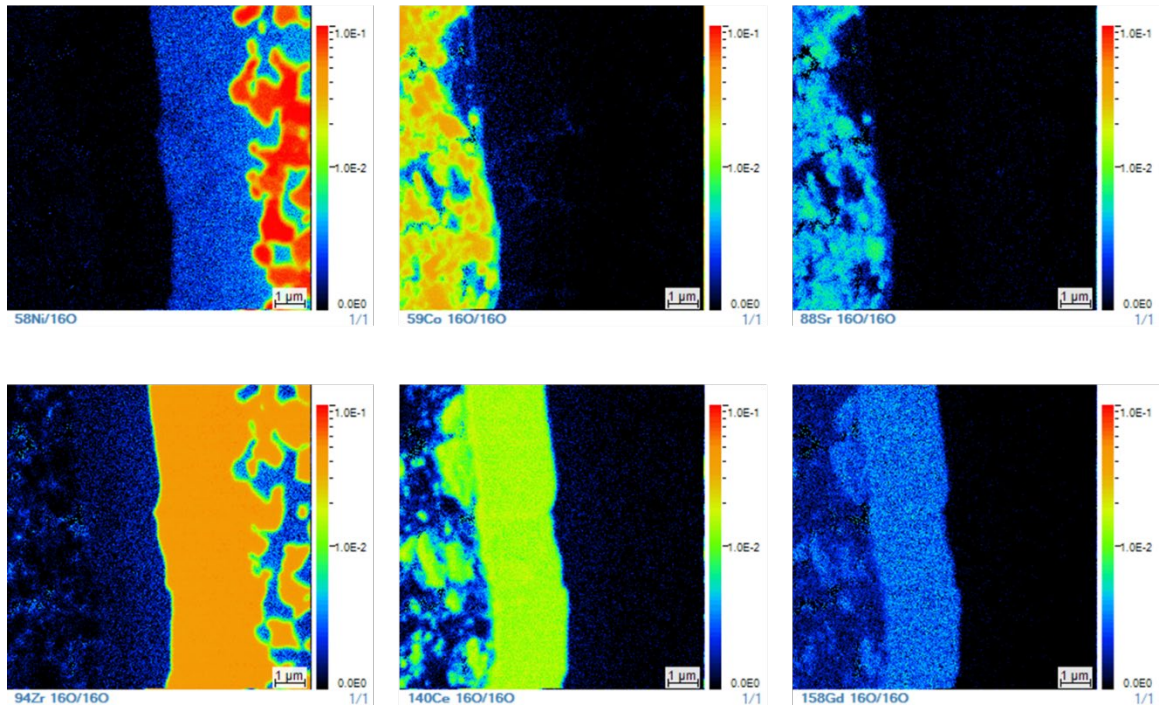

### Screen-printed YSZ, tested

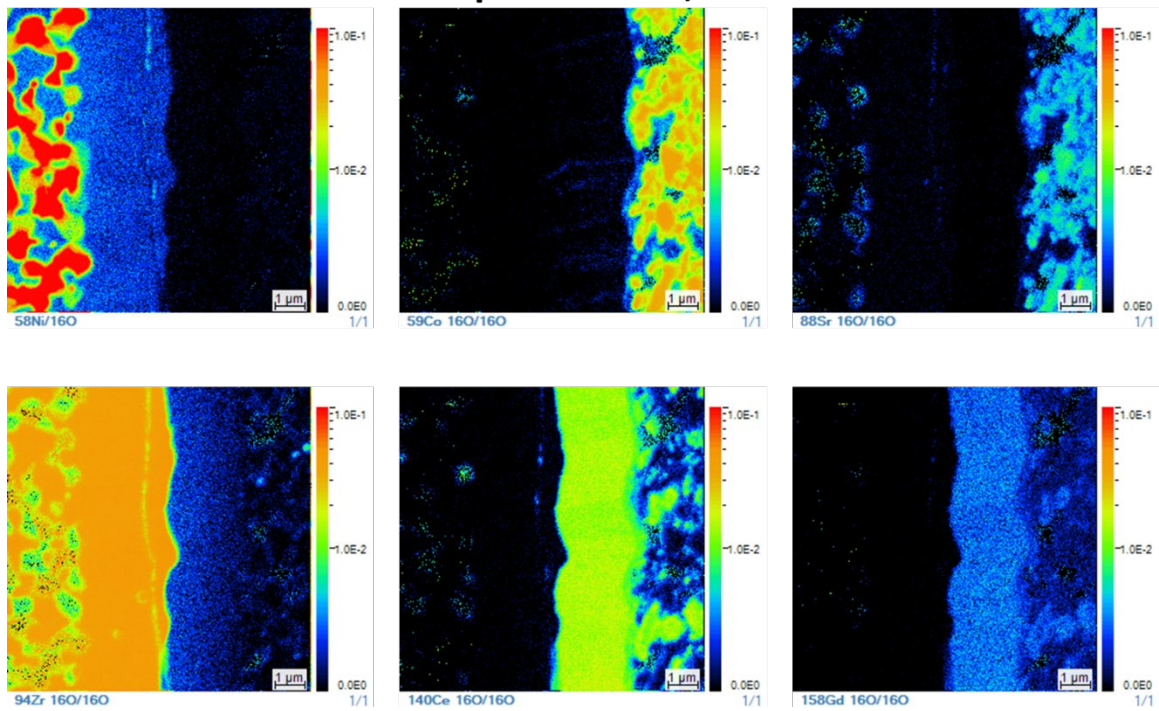

**Figure S3.** SIMS elemental mapping of  $^{58}\text{Ni}$ ,  $^{59}\text{Co}^{16}\text{O}$ ,  $^{88}\text{Sr}^{16}\text{O}$ ,  $^{94}\text{Zr}^{16}\text{O}$  and  $^{140}\text{Ce}^{16}\text{O}$  normalized by  $^{16}\text{O}$  for SP-2 (screen-printed YSZ layer).
